# Supplementary material for: Efficacy confirmation study of aceneuramic acid administration for GNE myopathy in Japan
Source: Springer Nature journal article supplement (doi:10.1186/s13023-023-02850-y), 2023-08-11
Supplement: MOESM1 [file 25914342]

## Supplementary Figures

Supplementary Figure 1 Mean and SD plots in change from baseline in (a) grip, (b) shoulder abductors, (c) elbow flexors, and (d) elbow extensors (UEC parameter) (FAS). Grip strength of 4 kg or less treated as 0 kg. Elbow Ext, elbow extensors; Elbow Flex, elbow flexors; FAS, full analysis set; SA-ER, sialic acid extended-release; SD, standard deviation; Shldr Abd, shoulder abductors; UEC, upper extremity composite.

(a)

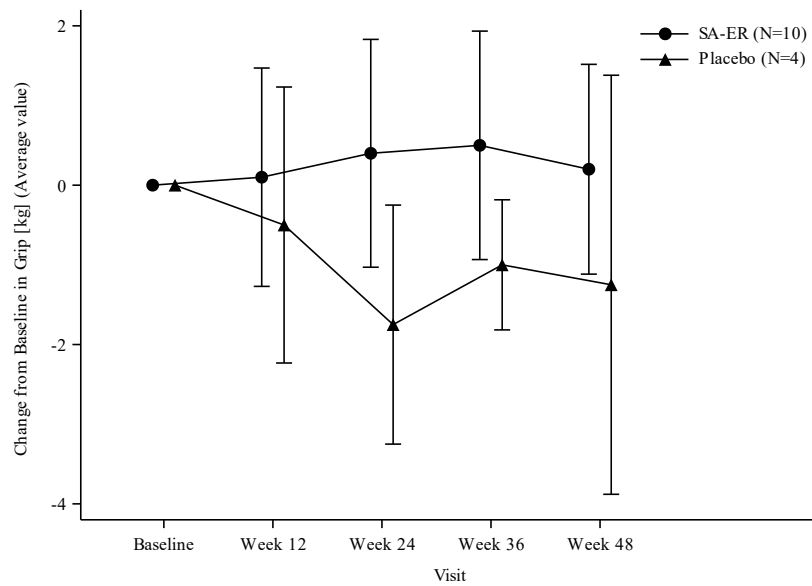

(b)

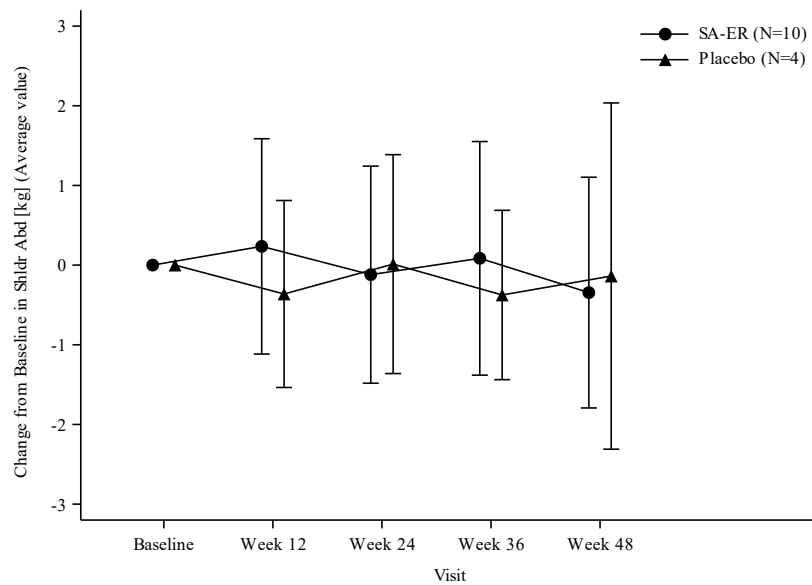

(c)

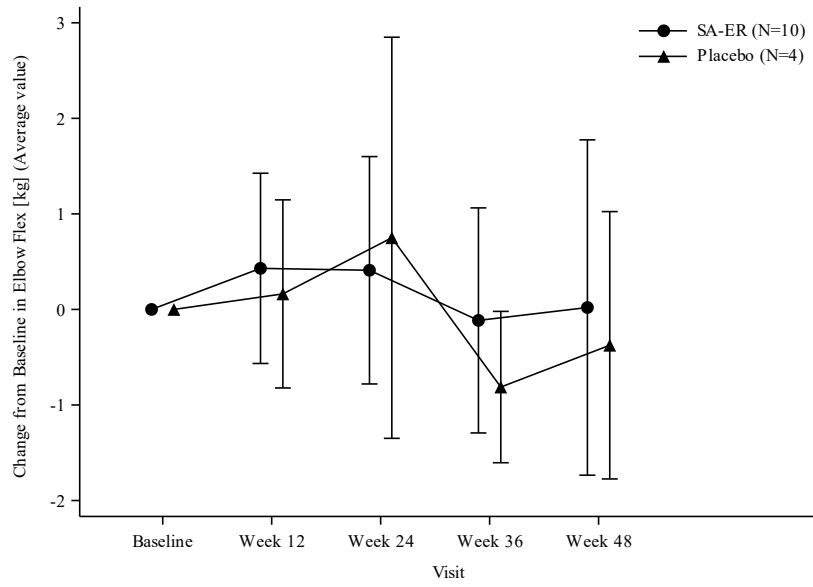

(d)

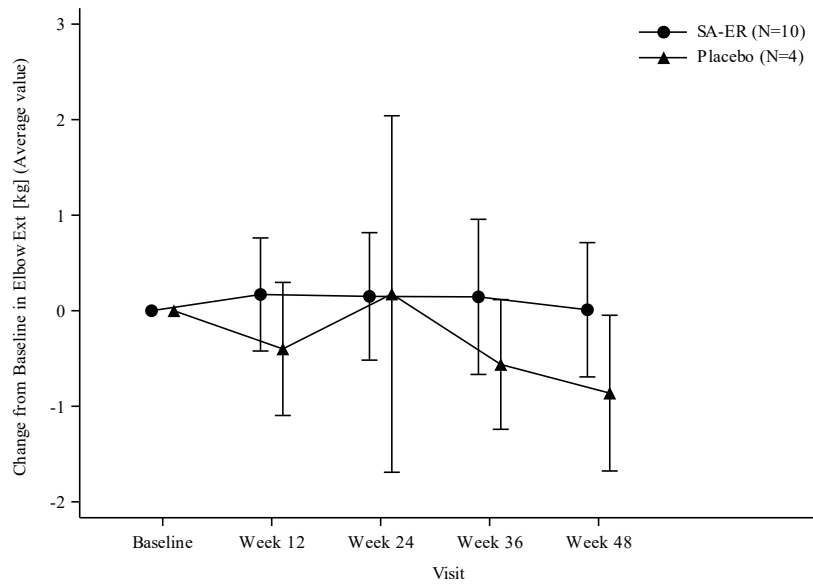

Supplementary Figure 2 Mean and SD plots in change from baseline in knee extensors (FAS). FAS, full analysis set; Knee Ext, knee extensors; SA-ER, sialic acid extended-release; SD, standard deviation.

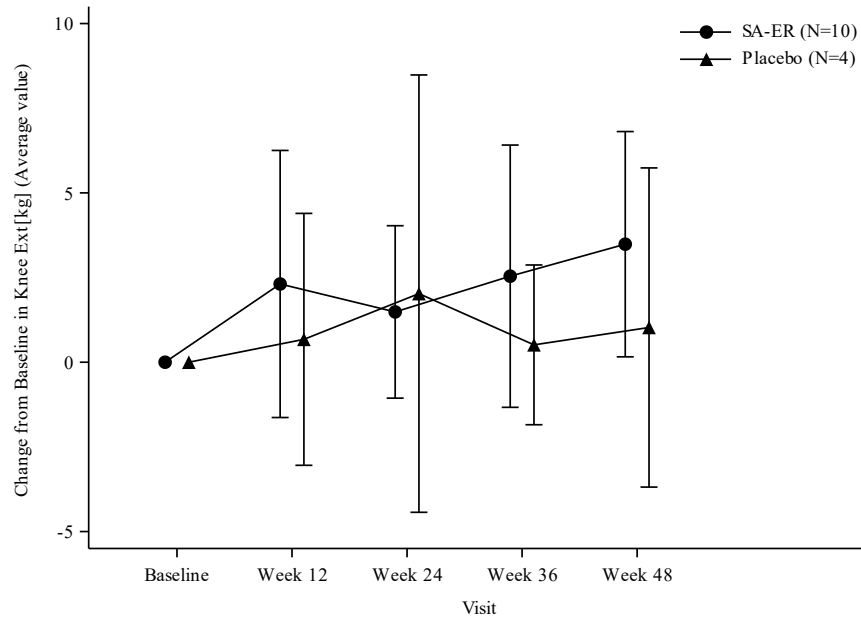

Supplementary Table 1 Full adverse events by system organ class and preferred term (Safety Population)

| System Organ Class                                   | SA-ER                    | Placebo                  |
|------------------------------------------------------|--------------------------|--------------------------|
| Preferred Term                                       | (N=10)                   | (N=4)                    |
|                                                      | n (%) [Number of Events] | n (%) [Number of Events] |
| Total                                                | 9 (90.0) [55]            | 4 (100.0) [17]           |
| Ear and labyrinth disorders                          | 1 (10.0) [1]             | 0 (0.0) [0]              |
| Vertigo                                              | 1 (10.0) [1]             | 0 (0.0) [0]              |
| Eye disorders                                        | 2 (20.0) [2]             | 0 (0.0) [0]              |
| Dry eye                                              | 2 (20.0) [2]             | 0 (0.0) [0]              |
| Gastrointestinal disorders                           | 6 (60.0) [19]            | 2 (50.0) [5]             |
| Abdominal pain                                       | 1 (10.0) [1]             | 0 (0.0) [0]              |
| Abdominal pain upper                                 | 0 (0.0) [0]              | 1 (25.0) [1]             |
| Constipation                                         | 1 (10.0) [2]             | 1 (25.0) [1]             |
| Dental caries                                        | 0 (0.0) [0]              | 1 (25.0) [1]             |
| Diarrhoea                                            | 2 (20.0) [11]            | 1 (25.0) [1]             |
| Dyspepsia                                            | 0 (0.0) [0]              | 1 (25.0) [1]             |
| Gastric polyps                                       | 1 (10.0) [1]             | 0 (0.0) [0]              |
| Gastroesophageal reflux disease                      | 2 (20.0) [2]             | 0 (0.0) [0]              |
| Nausea                                               | 1 (10.0) [1]             | 0 (0.0) [0]              |
| Large intestine polyp                                | 1 (10.0) [1]             | 0 (0.0) [0]              |
| General disorders and administration site conditions | 2 (20.0) [2]             | 2 (50.0) [2]             |
| Pyrexia                                              | 2 (20.0) [2]             | 2 (50.0) [2]             |
| Hepatobiliary disorders                              | 1 (10.0) [1]             | 0 (0.0) [0]              |
| Hepatic function abnormal                            | 1 (10.0) [1]             | 0 (0.0) [0]              |
| Immune system disorders                              | 3 (30.0) [4]             | 1 (25.0) [1]             |

|                                                                        |              |              |
|------------------------------------------------------------------------|--------------|--------------|
| Immunisation reaction                                                  | 3 (30.0) [4] | 1 (25.0) [1] |
| Infections and infestations                                            | 3 (30.0) [5] | 2 (50.0) [2] |
| Nasopharyngitis                                                        | 2 (20.0) [3] | 2 (50.0) [2] |
| Pharyngitis                                                            | 1 (10.0) [1] | 0 (0.0) [0]  |
| COVID-19                                                               | 1 (10.0) [1] | 0 (0.0) [0]  |
| Injury, poisoning and procedural complications                         | 3 (30.0) [4] | 2 (50.0) [3] |
| Facial bones fracture                                                  | 1 (10.0) [1] | 0 (0.0) [0]  |
| Fall                                                                   | 0 (0.0) [0]  | 1 (25.0) [1] |
| Face injury                                                            | 1 (10.0) [1] | 0 (0.0) [0]  |
| Contusion                                                              | 0 (0.0) [0]  | 1 (25.0) [2] |
| Thermal burn                                                           | 1 (10.0) [1] | 0 (0.0) [0]  |
| Skin abrasion                                                          | 1 (10.0) [1] | 0 (0.0) [0]  |
| Investigations                                                         | 1 (10.0) [1] | 1 (25.0) [1] |
| Electrocardiogram ST segment depression                                | 0 (0.0) [0]  | 1 (25.0) [1] |
| Gamma-glutamyltransferase increased                                    | 1 (10.0) [1] | 0 (0.0) [0]  |
| Musculoskeletal and connective tissue disorders                        | 2 (20.0) [8] | 0 (0.0) [0]  |
| Arthralgia                                                             | 1 (10.0) [1] | 0 (0.0) [0]  |
| Muscle spasms                                                          | 1 (10.0) [5] | 0 (0.0) [0]  |
| Myalgia                                                                | 1 (10.0) [1] | 0 (0.0) [0]  |
| Pain in extremity                                                      | 1 (10.0) [1] | 0 (0.0) [0]  |
| Neoplasms benign, malignant and unspecified (incl<br>cysts and polyps) | 0 (0.0) [0]  | 1 (25.0) [1] |
| Papillary thyroid cancer                                               | 0 (0.0) [0]  | 1 (25.0) [1] |
| Nervous system disorders                                               | 1 (10.0) [1] | 0 (0.0) [0]  |
| Headache                                                               | 1 (10.0) [1] | 0 (0.0) [0]  |
| Psychiatric disorders                                                  | 0 (0.0) [0]  | 1 (25.0) [1] |

|                                        |              |              |
|----------------------------------------|--------------|--------------|
| Adjustment disorder                    | 0 (0.0) [0]  | 1 (25.0) [1] |
| Skin and subcutaneous tissue disorders | 2 (20.0) [6] | 1 (25.0) [1] |
| Chloasma                               | 1 (10.0) [1] | 0 (0.0) [0]  |
| Cold urticaria                         | 1 (10.0) [2] | 0 (0.0) [0]  |
| Dermatitis                             | 0 (0.0) [0]  | 1 (25.0) [1] |
| Eczema                                 | 1 (10.0) [3] | 0 (0.0) [0]  |
| Vascular disorders                     | 1 (10.0) [1] | 0 (0.0) [0]  |
| Internal haemorrhage                   | 1 (10.0) [1] | 0 (0.0) [0]  |

MedDRA, Medical Dictionary for Regulatory Activities.

Subjects with more than one event within a Preferred Term or System Organ Class are counted once for each category.

Adverse events were encoded according to MedDRA Ver. 25.0.

Supplementary Table 2

Comparison of change in UEC score between groups (cFAS) (t-test)

| Visit   | SA-ER group |       |               | Placebo group |        |                | Difference between groups |              |         |
|---------|-------------|-------|---------------|---------------|--------|----------------|---------------------------|--------------|---------|
|         | N           | mean  | 95% CI        | N             | mean   | 95% CI         | mean                      | 95% CI       | p-value |
| Week 24 | 22          | 0.534 | -0.951, 2.019 | 7             | -2.921 | -6.113, 0.270  | 3.456                     | 0.453, 6.458 | 0.0257  |
| Week 48 | 22          | 0.050 | -1.648, 1.748 | 7             | -4.507 | -8.840, -0.174 | 4.557                     | 0.964, 8.150 | 0.0148  |

CI, confidence interval; cFAS, combined full analysis set; N, number of subjects; SA-ER, sialic acid extended-release; UEC, upper extremity composite.

cFAS includes all the subjects in our previous phase II/III study and newly enrolled subjects in the present phase III study.
